# Supplementary material
Source: PubMed Central journal article supplement (PMC10265310)
Supplement: jama-e238061-s001.pdf [file jama-e238061-s001.pdf]

## Supplemental Online Content

Epstein LH, Wilfley DE, Kilanowski C, et al. Family-based behavioral treatment for childhood obesity implemented in pediatric primary care. *JAMA*. Published online June 13, 2023. doi:10.1001/jama.2023.8061

### **Supplement 1.** Members of the Data and Safety Monitoring Board

Practice characteristics

Traffic Light Diet food examples

Coach training components and tools

Fidelity Checklist

Power analysis and sample size calculations

Comparison of families with and without participating siblings

Raw data for weight outcomes box plots

Change in percent over median BMI box plots

Full model output for primary and secondary analyses

Full model output for sensitivity analyses

Serious adverse events

Modifications to the Data Analytic Plan

eReferences

This supplemental material has been provided by the authors to give readers additional information about their work.

## Administrative Supplement

|     | <b>Topic</b>                                                   | <b>page</b> |
|-----|----------------------------------------------------------------|-------------|
| 1.  | Members of the Data and Safety Monitoring Board                | 2           |
| 2.  | Practice characteristics                                       | 3           |
| 3.  | Traffic Light Diet food examples                               | 4-5         |
| 4.  | Coach training components and tools                            | 6           |
| 5.  | Fidelity Checklist                                             | 7-8         |
| 6.  | Power analysis and sample size calculations                    | 9-11        |
| 7.  | Comparison of families with and without participating siblings | 12          |
| 8.  | Raw data for weight outcomes box plots                         | 13          |
| 9.  | Change in percent over median BMI box plots                    | 14          |
| 10. | Full model output for primary and secondary analyses           | 15-18       |
| 11. | Full model output for sensitivity analyses                     | 19-26       |
| 12. | Serious adverse events                                         | 27          |
| 13. | Modifications to the Data Analytic Plan                        | 22-29       |
| 14. | Additional Analytic details                                    | 30          |
| 15. | References                                                     | 31          |

## **1. Members of the Data and Safety Monitoring Board**

Tom Robinson, M.D., The Irving Schuman Professor of Child Health, Stanford University, Stanford, CA., Chair

Leann Birch, Ph.D., Professor, Department of Foods and Nutrition, University of Georgia, Athens, GA. deceased

John Jakicic, Ph.D. Research Professor, Department of Internal Medicine in the Division of Physical Activity and Weight Management, previously Distinguished Professor, Department of Health and Physical Activity, University of Pittsburgh, Pittsburgh, PA.

Elissa Jelalian, Ph.D. Professor of Psychiatry and Human Behavior, Brown University, Providence, RI

DeJuran Richardson, Ph.D. Ernest H. Volwiler Professor of Mathematics, Lake Forest College, Lake Forest, Ill.

## 2. eTable 1: Practice characteristics

Characteristics of the pediatric practices at each site.

| Site                 | Number of Practices | Range of Providers per Practice | Range of Children Ages 6-12 per Practice | Range of Estimated % Overweight | Population Sample                             |
|----------------------|---------------------|---------------------------------|------------------------------------------|---------------------------------|-----------------------------------------------|
| <b>Buffalo, NY</b>   | 9                   | 3 - 12                          | 1459 - 4000                              | 19 - 35                         | 1 Urban<br>4 Suburban<br>1 Rural<br>2 Diverse |
| <b>Columbus, OH</b>  | 15                  | 4-13                            | 1200 - 23556                             | 30 - 49                         | 1 Urban<br>1 Suburban                         |
| <b>Rochester, NY</b> | 6                   | 12 - 15                         | 4617 - 4823                              | 31 - 46                         | 4 Suburban<br>2 Diverse                       |
| <b>St. Louis, MO</b> | 6                   | 2 - 6                           | 1330- 5998                               | 11 - 20                         | 1 Urban<br>4 Suburban<br>1 Rural              |

### 3. Traffic Light Diet food examples

The traffic light food diet characterizes foods as either green, yellow, or red.

**Green foods** are “go foods” that PLAN participants are strongly encouraged to eat. These include non-starchy vegetables such as asparagus, cauliflower, celery, green leafy vegetables and peppers.

**Yellow foods** have healthy foods that have somewhat more calories per gram than green foods. These include foods from multiple food groups that include vegetables, fruits, grains, dairy products and condiments. Specific examples of yellow foods are artichokes, carrots, butternut squash, apples, blueberries strawberries, breads, bagels, rice, milk, yogurt, low fat cheese, eggs, chicken, and white fish. Condiments in the yellow food category include mustard, salsa, and yogurt-based salad dressings.

**Red foods** are recommended only in small quantities because they have the most calories per gram. They include examples from all food groups such as avocados, French fried potatoes and other fried vegetables, dried fruits, coconut, fruit juices, cookies, sugared cereals, whole milk, sour cream, ice cream, red meats, nuts, processed meats like chicken nuggets, fried eggs and bacon.

**eTable 2. Examples of the foods in the Traffic Light Diet**

|                    | EXAMPLE FOODS                                                                             |                                                                                        |                                                                                       |
|--------------------|-------------------------------------------------------------------------------------------|----------------------------------------------------------------------------------------|---------------------------------------------------------------------------------------|
| Food Groups        | GREEN                                                                                     | YELLOW                                                                                 | RED                                                                                   |
| Vegetables         | Asparagus, Broccoli, Cauliflower, Celery, green leafy vegetables, mushrooms, peppers, etc | Artichokes hearts in water, Tomato sauce, vegetable juice                              | Artichoke hearts in oil, Tomato sauces with oil                                       |
| Starchy Vegetables |                                                                                           | Beets, corn, mixed vegetables, parsnips, peas, potatoes, sweet potatoes, winter squash | French Fries, candied yams                                                            |
| Fruit              |                                                                                           | Apples, banana, berries, melons, clementine, oranges, grapes, etc.                     | Avocado, banana, berries in syrup, cherries in syrup                                  |
|                    |                                                                                           |                                                                                        | Cranberries, dried berries, figs, raisins, fruit juice                                |
| Grains             |                                                                                           | Bagels, barley, biscuits, bread, cereal, crackers, pancakes, pasta, popcorn, rice      | Cheez-It, goldfish, muffins, cheese crackers, butter popcorn, teddy grahams, stuffing |

|                                                    |       |                                                                                                                                          |                                                                                                                                            |
|----------------------------------------------------|-------|------------------------------------------------------------------------------------------------------------------------------------------|--------------------------------------------------------------------------------------------------------------------------------------------|
|                                                    |       | Kix, special k,<br>unsweetened cereals                                                                                                   | Sweetened cereals,<br>granola                                                                                                              |
| Food Groups                                        | Green | Yellow                                                                                                                                   | Red                                                                                                                                        |
| Dairy                                              |       | Fat free, low fat, 1%<br>cheese, cottage cheese,<br>fat free and low-fat<br>cream cheese, fat free<br>and low fat milks, plain<br>yogurt | Full fat cheese, cottage<br>cheese, full fat cream<br>cheese, whole milk,<br>chocolate milk,<br>flavored yogurt                            |
| Protein                                            |       | Bean and legumes, 95%<br>lean beef, chicken and<br>turkey (no skin), eggs,<br>low fat meat substitutes,<br>lean cuts of pork,<br>seafood | Baked beans, higher fat<br>beef, chicken wings,<br>duck, hot dogs,<br>sausage, pepperoni,<br>nuts and seeds                                |
| Fats, Oils,<br>Sweets &<br>Others                  |       |                                                                                                                                          | Alcohol, sugared<br>drinks, oils, lard,<br>candy, cakes, cookies,<br>popsicles, pies, ice<br>cream, frozen desserts,<br>salty fried snacks |
| Soups                                              |       | Broth type soups                                                                                                                         | Cream type soups                                                                                                                           |
| Condiments,<br>Dressings &<br>Other<br>Ingredients |       | Cocktail sauce, hot<br>sauce, salsa, relish, soy<br>sauce, fat free and low-<br>fat salad dressings                                      | Butter, mayonnaise,<br>chocolate syrup, maple<br>syrup, artificial<br>sweeteners                                                           |

**4. eTable 3: Coach training components and tools.**

| <b>Domain</b>       | <b>Components of Training</b>                                                                                                       | <b>Tools</b>                                                                                      | <b>Completion</b>                                                |
|---------------------|-------------------------------------------------------------------------------------------------------------------------------------|---------------------------------------------------------------------------------------------------|------------------------------------------------------------------|
| Education           | Principles in behavior, diet, exercise                                                                                              | Study manuals (parent), journal readings, website review                                          | Readings complete                                                |
|                     | Parenting<br>Delay discounting<br>Social facilitation<br>Study basics                                                               | Protocol, MOP, reference guides (food & activity)                                                 | Readings complete                                                |
|                     | Don't Shoot the Dog, Friends Forever, Cooper ABA                                                                                    | Books & quiz provided                                                                             | Readings complete, passing quiz score                            |
| Interactive         | In-person workshops<br>Role-plays<br>Pilot families                                                                                 | PIs and study team FBT experts<br>TFC<br>2 families per coach with 12 sessions                    | Active participation<br><br>Audio recordings reviewed by TFC     |
| Skill Assessment    | Parent manual readings & quizzes<br>Treatment knowledge<br>Height & weight training<br>Simulation Calls                             | Website administered<br><br>Institution provided<br>4 sequential FBT simulations                  | ≥80% score<br><br>Mastery of measurements<br>Scored as competent |
| Ongoing Supervision | Weekly conference calls to discuss treatment concerns<br>Supervisors complete fidelity rating checklist for reviewed audio sessions | Conference link provided, led by TFC<br><br>Session audio recordings<br>Fidelity rating checklist | Attendance<br><br>Uploaded to secure site<br>Scored as competent |
| Booster Trainings   | Training workshops on various topics<br>Competency score                                                                            | TFC provide interactive workshops                                                                 | Attendance<br><br>≥80% score                                     |

## 5. eTable 4: Fidelity Checklist

| Domain                                       | Treatment Component                                                                                                                                                                                      | Fidelity Items                                                              |
|----------------------------------------------|----------------------------------------------------------------------------------------------------------------------------------------------------------------------------------------------------------|-----------------------------------------------------------------------------|
| Mastery Based Skills                         | Weight Change                                                                                                                                                                                            | Connect weight change to behaviors                                          |
|                                              | Behavioral Goals                                                                                                                                                                                         | Calorie range                                                               |
|                                              |                                                                                                                                                                                                          | GREEN foods                                                                 |
|                                              |                                                                                                                                                                                                          | RED foods/drinks                                                            |
|                                              |                                                                                                                                                                                                          | Daily check-in (Parent only)                                                |
|                                              |                                                                                                                                                                                                          | Praise statements (Parent only)                                             |
|                                              |                                                                                                                                                                                                          | Stimulus control (Parent only)                                              |
|                                              |                                                                                                                                                                                                          | Meal planning (Parent only)                                                 |
|                                              |                                                                                                                                                                                                          | Self-weigh                                                                  |
|                                              |                                                                                                                                                                                                          | GREEN activity                                                              |
|                                              |                                                                                                                                                                                                          | RED activity                                                                |
|                                              |                                                                                                                                                                                                          | Healthy sleep routines                                                      |
|                                              |                                                                                                                                                                                                          | Dinners prepared at home (Parent only)                                      |
|                                              |                                                                                                                                                                                                          | PA with family                                                              |
|                                              |                                                                                                                                                                                                          | HE and PA with friends                                                      |
|                                              | Accessing HE and PA resources in the community                                                                                                                                                           |                                                                             |
| Food and Activity Reference Guides (FRG/ARG) | Demonstrate knowledge of the FRG and ARG                                                                                                                                                                 |                                                                             |
| Parenting                                    | Discuss parental role in helping child make changes in the specified behavioral targets ( <i>e.g., modeling, praise, daily check-ins, stimulus control, contingency management, rules and routines</i> ) |                                                                             |
| Reinforcement                                | Identify reinforcement and discuss importance of providing in timely manner                                                                                                                              |                                                                             |
| Educational Materials                        | Discuss progress/understanding of educational material and quizzes                                                                                                                                       |                                                                             |
| Session Content                              | Treatment Materials                                                                                                                                                                                      | Provide tailored review of information                                      |
|                                              |                                                                                                                                                                                                          | Engage family in session content                                            |
|                                              |                                                                                                                                                                                                          | Provide appropriate session materials                                       |
|                                              | Individualized Treatment                                                                                                                                                                                 | Ability to keep family focused on session                                   |
|                                              |                                                                                                                                                                                                          | Assess needs, motivation, and progress of family                            |
|                                              | Problem-Solving                                                                                                                                                                                          | Ability to understand when to move family forward to next topic and/or goal |
| Planning                                     | Allow/encourage family to identify barriers and potential solutions                                                                                                                                      |                                                                             |
|                                              |                                                                                                                                                                                                          | Allow/encourage family to lead process                                      |



| Domain        | Treatment Component | Fidelity Items                                                                             |
|---------------|---------------------|--------------------------------------------------------------------------------------------|
|               |                     | Provide and discuss homework for the upcoming week                                         |
| Session Style | Time Management     | Ability to adequately attend to all components of session outline (REFLECT, EDUCATE, PLAN) |
|               |                     | Generally, adheres to timing of outline in order to meet FBT session goals                 |
|               | Collaboration       | Ability to establish and build rapport                                                     |
|               | Positivity          | Avoid shaming/judgmental discussion                                                        |
|               |                     | Demonstrate modeling of the use of praise statements                                       |
|               | Listening           | Utilizing the pause                                                                        |
|               |                     | Address concerns/questions in appropriate manner                                           |
|               | Support             | Ability to continually be supportive regardless of progress                                |
|               |                     | Demonstrate problem solving skills to move family forward                                  |
|               |                     | Provide praise for accomplishments                                                         |

Footnote: For every item, the supervisor listens to the audio recorded FBT sessions and rates the coach on adherence and quality. Adherence is scored as either Yes or No and quality is scored as either Needs Improvement, Meets Expectations, or Exceeds Expectations. If an item was not expected to be discussed in session, the supervisor has the option to rate adherence and quality as Not Applicable.

## 6. Power analysis and sample size calculations

Power computations for PLAN employ simulations and two-sided tests at the 0.05 level of significance. The simulations reflect the planned primary analysis of covariance and the fact that this is an individually randomized group treatment trial with the coach (N=3 per site) nested within the site (N=4 sites) in the FBT group but with no such nesting in the UC group. The analysis of covariance that is simulated in the power computations treats the 24-month value of the outcome measure as the dependent variable and the baseline value as a covariate. The use of this approach reflects the primary study goal of comparing 24-month values across groups, with the outcome being compared being percent over normalized BMI in the participating child. Each result is based on 1000 simulations.

Tabulated power values employ sample sizes of 528 and that are between 65% and 95% of that total. Effect size estimates are generated using considerations and preliminary data discussed below. Usual care data involving an intervention and subjects most similar to our UC group is provided by Kalarchian<sup>1</sup> who randomized 81 8-12-year-old children with obesity to a usual care control condition and found an average percent overweight change of  $-0.17 \pm 10.08$  at 1 year. We expect some deterioration in this group at 2 years but will assume conservatively for the purpose of power computations that the two-year change will be  $0 \pm 10.08$  in the UC group in the proposed research. Our estimated change in the FBT group begins with a review of six studies<sup>2-7</sup> authored by Dr. Epstein. There were 314 overweight/obesity children in those studies who received FBT interventions similar to the one we will employ. When we combined the data for those 314 children, we found an overall average decrease in percent over BMI of  $10.6 \pm 15.3$  at 24 months.

In translating the above decrease of  $10.6 \pm 15.3$  in percent over BMI at 24 months into the setting of the proposed research, we emphasize that the seven referenced studies implemented FBT in controlled academic settings where we anticipate better performance than is likely in the family practices we will employ in this study. To estimate the degree to which the effect is likely to be attenuated when we switch from highly controlled to more “real life” settings, we considered the following. The child weight management intervention MEND (Mind, Exercise, Nutrition, Do it) focused on children age 7-13 who exceeded the 91<sup>st</sup> weight percentile. MEND employed both (1) a community-based mass-implementation intervention<sup>8</sup> involving many programs and 9563 subjects who provided complete data and (2) a rigorous randomized trial (N=116)<sup>9</sup> analogous to the Epstein studies referenced in the preceding paragraph.<sup>2-7</sup> The 12-month results were reductions in BMI of  $0.79 \text{ kg/m}^2$  in the community study as compared to  $1.04 \text{ kg/m}^2$  in the intervention arm of the randomized trial. Thus, the reduction in the community-based MEND intervention was 76.0% of the magnitude that was observed in the family-based arm of the randomized trial.

Based on this 76.0%, our computations conservatively assume changes in the intervention group that are 50%, 60%, and 70% of the previously observed change of  $10.6 \pm 15.3$  that was observed in the rigorous academic environment of Dr. Epstein’s studies.<sup>2-7</sup> Thus, we base our power on a comparison of projected reductions of  $5.3 \pm 15.3$  (50% of  $10.6 \pm 15.3$ ),  $6.4 \pm 15.3$  (60% of  $10.6$ ), and  $7.4 \pm 15.3$  (70% of  $10.6$ ) in the FBT group as compared to  $0 \pm 10.08$  in the UC group. In

addition, given projected standard deviations of 15.3 and 10.08 in the two groups, we use the maximum and the mean of those two values and thereby compute power assuming standard deviations of both 15.3 and 12.7. In performing the calculations summarized below, we emphasize that we will have actual or imputed 24-month data on all subjects. To see details of how we will impute the 24 month values when necessary, please see the section below titled “Implementation of the Intention-to-Treat Principle.”

eTable 5 contains the results of the power computations using the parameters discussed above, assuming the compound symmetry covariance structure in both study arms and assuming an intraclass correlation coefficient (ICC) in the UC group of 0.01 and ICCs in the FBT group of 0.04, 0.06, 0.10, and 0.15. We assume a small ICC in the UC group of 0.01 because there is no clustering within that group meaning that the ICC should be essentially zero. While we do not have data with which to estimate the ICC in the FBT group, we note that many cluster trials that involve group interventions have reported ICCs in the 0.01 to 0.05 range. Since the PLAN intervention is individualized and since we expect PLAN children to have no contact with one another, we do not face the impact on the ICC that is present in many cluster trials. This argues for a very small ICC in the FBT group. By contrast, the fact that the same coach will be responsible for multiple children will inevitably increase the ICC above where it might otherwise be. Based on these considerations, we tabulate power for ICCs in the FBT group that range from 0.04 to 0.15. However, the many other studies that have used group interventions while yielding ICCs below 0.05 suggests that the ICC ultimately observed in PLAN will be substantially less than 0.1.

Results in eTable 5 indicate that if we recruit 100% of our original target of 528 families, power will be excellent for all tabulated scenarios with an ICC in the FBT group of 0.1 or less. For an ICC no bigger than 0.1, power remains adequate for most scenarios if we recruit at least 80% of the target (N = 432). If recruitment is below the 80% figure, an adequate power of at least 0.8 requires either the smaller of the two tabulated standard deviations or a mean difference that is at least 60% of the value observed in Dr. Epstein’s studies (difference at least 6.4).

Computations are for the primary outcome which is the percent over the 50<sup>th</sup> percentile of BMI in children. Results are generated using 1000 simulations of the primary analytic model: an analysis of covariance with the 24-month value as the dependent variable and the baseline value as a covariate. The analysis reflects the fact that this is an individually randomized group treatment trial in which the coach is nested within the site within the FBT group but which is different from a classic cluster randomized trial in that there is no such nesting within the control (UC) group. The total number of randomized families is assumed to range from 65% to 100% of the target of 528. Tabulations assume an ICC of 0.01 in the UC group and of 0.04, 0.06, 0.10, and 0.15 in the FBT group, mean differences of 5.3, 6.4 and 7.4 (which represent 50%, 60%, and 70% of observed results in previous studies), and standard deviations of 12.7 and 15.3.

**eTable 5: Statistical power for two sided tests at the 0.05 level of significance.**

| ICC     |        | SD   | Mean diff | Statistical power associated with sample sizes ranging from 65% to 100% of original target of 528 |             |             |             |             |             |             |             |      |
|---------|--------|------|-----------|---------------------------------------------------------------------------------------------------|-------------|-------------|-------------|-------------|-------------|-------------|-------------|------|
| FBT grp | UC grp |      |           | N=528 (100%)                                                                                      | N=502 (95%) | N=476 (90%) | N=449 (85%) | N=422 (80%) | N=396 (75%) | N=370 (70%) | N=344 (65%) |      |
| 0.04    | 0.01   | 12.7 | 5.3       | 0.95                                                                                              | 0.95        | 0.94        | 0.92        | 0.93        | 0.92        | 0.89        | 0.89        |      |
|         |        |      | 6.4       | 0.99                                                                                              | 0.98        | 0.99        | 0.98        | 0.99        | 0.98        | 0.98        | 0.98        | 0.97 |
|         |        |      | 7.4       | 1.00                                                                                              | 1.00        | 1.00        | 1.00        | 1.00        | 1.00        | 1.00        | 0.99        | 1.00 |
|         |        | 15.3 | 5.3       | 0.84                                                                                              | 0.83        | 0.83        | 0.81        | 0.80        | 0.76        | 0.76        | 0.76        | 0.74 |
|         |        |      | 6.4       | 0.96                                                                                              | 0.94        | 0.95        | 0.92        | 0.91        | 0.91        | 0.91        | 0.88        | 0.87 |
|         |        |      | 7.4       | 0.99                                                                                              | 0.99        | 0.99        | 0.98        | 0.97        | 0.97        | 0.97        | 0.97        | 0.96 |
| 0.06    | 0.01   | 12.7 | 5.3       | 0.92                                                                                              | 0.91        | 0.90        | 0.90        | 0.88        | 0.87        | 0.85        | 0.84        |      |
|         |        |      | 6.4       | 0.98                                                                                              | 0.98        | 0.98        | 0.98        | 0.97        | 0.96        | 0.95        | 0.95        |      |
|         |        |      | 7.4       | 1.00                                                                                              | 1.00        | 1.00        | 1.00        | 0.99        | 0.99        | 0.99        | 0.99        | 0.99 |
|         |        | 15.3 | 5.3       | 0.80                                                                                              | 0.79        | 0.77        | 0.78        | 0.74        | 0.73        | 0.70        | 0.68        |      |
|         |        |      | 6.4       | 0.92                                                                                              | 0.91        | 0.92        | 0.91        | 0.88        | 0.87        | 0.85        | 0.84        |      |
|         |        |      | 7.4       | 0.97                                                                                              | 0.97        | 0.96        | 0.97        | 0.96        | 0.95        | 0.93        | 0.94        |      |
| 0.10    | 0.01   | 12.7 | 5.3       | 0.85                                                                                              | 0.83        | 0.81        | 0.83        | 0.80        | 0.80        | 0.76        | 0.76        |      |
|         |        |      | 6.4       | 0.95                                                                                              | 0.94        | 0.94        | 0.93        | 0.91        | 0.92        | 0.91        | 0.88        |      |
|         |        |      | 7.4       | 0.98                                                                                              | 0.98        | 0.98        | 0.98        | 0.98        | 0.97        | 0.97        | 0.97        | 0.97 |
|         |        | 15.3 | 5.3       | 0.69                                                                                              | 0.68        | 0.69        | 0.63        | 0.67        | 0.65        | 0.62        | 0.60        |      |
|         |        |      | 6.4       | 0.84                                                                                              | 0.82        | 0.84        | 0.81        | 0.81        | 0.77        | 0.76        | 0.78        |      |
|         |        |      | 7.4       | 0.94                                                                                              | 0.94        | 0.92        | 0.92        | 0.91        | 0.89        | 0.89        | 0.87        |      |
| 0.15    | 0.01   | 12.7 | 5.3       | 0.73                                                                                              | 0.75        | 0.71        | 0.72        | 0.69        | 0.70        | 0.70        | 0.68        |      |
|         |        |      | 6.4       | 0.86                                                                                              | 0.85        | 0.83        | 0.85        | 0.85        | 0.84        | 0.83        | 0.81        |      |
|         |        |      | 7.4       | 0.95                                                                                              | 0.95        | 0.95        | 0.94        | 0.94        | 0.93        | 0.93        | 0.92        |      |
|         |        | 15.3 | 5.3       | 0.57                                                                                              | 0.59        | 0.55        | 0.56        | 0.53        | 0.53        | 0.52        | 0.52        |      |
|         |        |      | 6.4       | 0.73                                                                                              | 0.74        | 0.70        | 0.73        | 0.71        | 0.67        | 0.68        | 0.65        |      |
|         |        |      | 7.4       | 0.86                                                                                              | 0.82        | 0.86        | 0.83        | 0.82        | 0.81        | 0.80        | 0.79        |      |

### 7. eTable 6: Comparison of families with and without participating siblings

Descriptive characteristics of families who had siblings participating versus those who did not have siblings participating.

|                                               | Families with sibling participation | Families without sibling participation |
|-----------------------------------------------|-------------------------------------|----------------------------------------|
| n                                             | 94                                  | 358                                    |
|                                               | N (%)                               | N (%)                                  |
| Targeted Child Sex                            |                                     |                                        |
| Female                                        | 57 (60.6)                           | 185 (51.7)                             |
| Male                                          | 37 (39.4)                           | 173 (48.3)                             |
| Targeted Parent Sex                           |                                     |                                        |
| Female                                        | 85 (90.4)                           | 303 (84.6)                             |
| Male                                          | 9 (9.6)                             | 55 (15.4)                              |
| Treatment                                     |                                     |                                        |
| Usual Care                                    | 43 (45.7)                           | 183 (51.1)                             |
| FBT                                           | 51 (54.3)                           | 175 (48.9)                             |
| Race                                          |                                     |                                        |
| American Indian                               | 1 (1.1)                             | 0 (0)                                  |
| Asian                                         | 1 (1.1)                             | 7 (2.0)                                |
| African American                              | 25 (26.6)                           | 98 (27.4)                              |
| White                                         | 49 (52.1)                           | 209 (58.4)                             |
| Multiracial                                   | 12 (12.8)                           | 27 (7.5)                               |
| Other                                         | 4 (4.3)                             | 14 (3.9)                               |
| Refused                                       | 2 (2.1)                             | 3 (1.9)                                |
| Ethnicity                                     |                                     |                                        |
| Hispanic                                      | 13 (13.8)                           | 29 (8.1)                               |
| Non Hispanic                                  | 81 (86.2)                           | 329 (91.9)                             |
|                                               | Mean (SD)                           | Mean (SD)                              |
| Targeted Child % over median BMI, baseline    | 61.6 (26.6)                         | 58.8 (27.1)                            |
| Targeted Child % over BMI change, 0-24 months | 8.3 (16.7) [n = 83]                 | 6.8 (16.9) [n = 317]                   |
| Parent BMI, baseline                          | 37.6 (7.2)                          | 36.9 (7.9)                             |
| Parent BMI change, 0-24 months                | -0.2 (2.8) [n = 68]                 | -0.4 (3.1) [n = 254]                   |
| Family Size                                   | 4.8 (1.3)                           | 4.4 (1.2)                              |
| Targeted parent years of Education            | 14.9 (2.3)                          | 15.0 (2.3)                             |
| Annual Household Income (thousand \$)         | 83.6 (55.5)                         | 84.0 (55.5)                            |

## 8. Raw data for weight outcomes

**eFigure 1.** Change in percent over median BMI from baseline by treatment group, for the full family sample

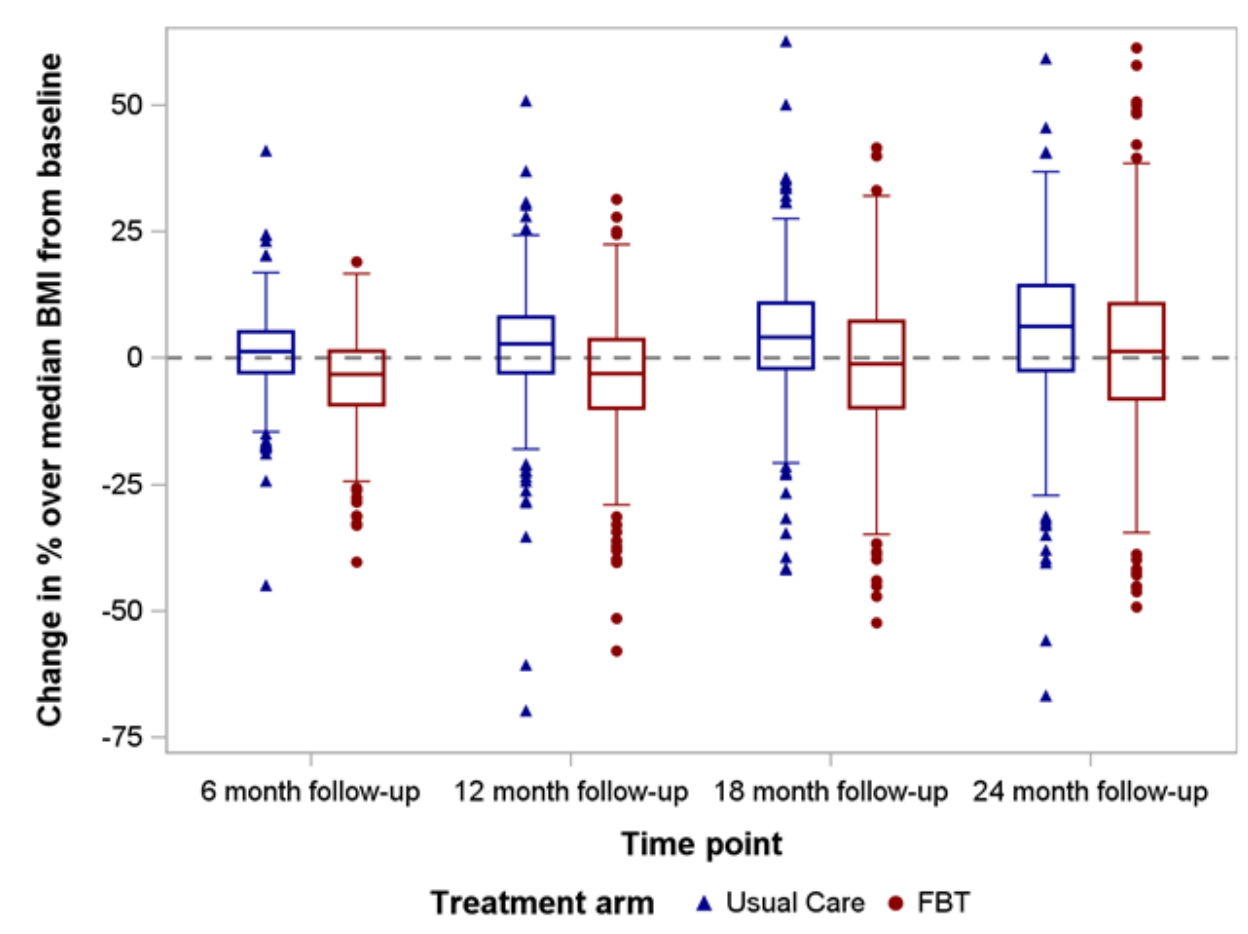

9. eFigure 2: Change in percent over median BMI from baseline by treatment group, stratified by family role

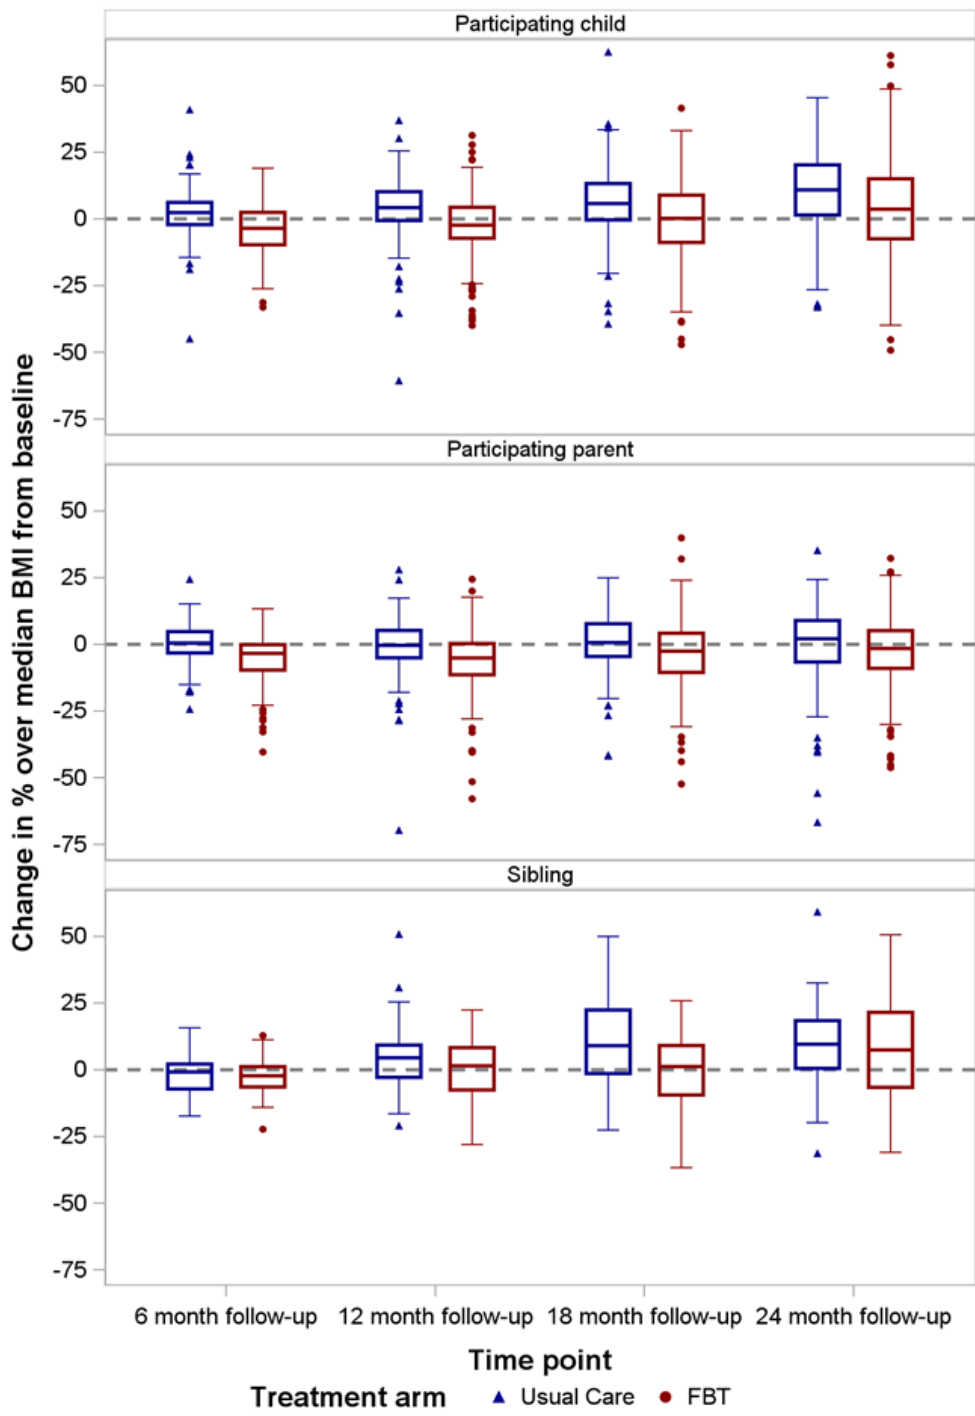

### 10. eTable 7: Full model output for primary and secondary analyses

**eTable 7a: Primary Analysis of Covariance for Child Outcomes**

| Model                                                                                                                                                        | Model Effect                                                                    | Estimate (95% CI)        | P-value |
|--------------------------------------------------------------------------------------------------------------------------------------------------------------|---------------------------------------------------------------------------------|--------------------------|---------|
| Adjusted for site and baseline % over median only                                                                                                            | FBT - UC                                                                        | -6.22 (-12.079, -0.362)  | 0.037   |
|                                                                                                                                                              | Baseline % over median BMI                                                      | 1.064 (1.005, 1.122)     | <.001   |
|                                                                                                                                                              | Study Site: Buffalo - St. Louis                                                 | 1.892 (-2.326, 6.11)     | 0.379   |
|                                                                                                                                                              | Study Site: Columbus - St. Louis                                                | 3.126 (-1.145, 7.398)    | 0.151   |
|                                                                                                                                                              | Study Site: Rochester - St. Louis                                               | -5.247 (-9.721, -0.773)  | 0.022   |
| Adjusted for site, baseline % over median, follow-up time, months of follow-up during COVID, baseline age, sex, race, parent education, and household income | FBT - UC                                                                        | -6.214 (-10.136, -2.292) | 0.002   |
|                                                                                                                                                              | Baseline % over median BMI                                                      | 1.07 (1.011, 1.129)      | <.001   |
|                                                                                                                                                              | Study Site: Buffalo - St. Louis                                                 | 2.046 (-2.07, 6.162)     | 0.330   |
|                                                                                                                                                              | Study Site: Columbus - St. Louis                                                | 0.323 (-4.292, 4.938)    | 0.891   |
|                                                                                                                                                              | Study Site: Rochester - St. Louis                                               | -4.977 (-9.269, -0.686)  | 0.023   |
|                                                                                                                                                              | Months between baseline and 24-month follow-up                                  | 0.243 (-0.401, 0.886)    | 0.460   |
|                                                                                                                                                              | Months of follow-up after start of COVID-19 pandemic                            | 0.416 (0.113, 0.718)     | 0.007   |
|                                                                                                                                                              | Child sex: Female - Male                                                        | 0.263 (-2.753, 3.28)     | 0.864   |
|                                                                                                                                                              | Child race: White - Black                                                       | -8.512 (-12.384, -4.64)  | <.001   |
|                                                                                                                                                              | Child race: Other race - Black                                                  | -1.687 (-7.648, 4.274)   | 0.579   |
|                                                                                                                                                              | Child age at baseline                                                           | -2.447 (-3.235, -1.66)   | <.001   |
|                                                                                                                                                              | Household income (in \$1000's)                                                  | -0.011 (-0.047, 0.025)   | 0.541   |
|                                                                                                                                                              | Parent education: High school graduate or less - Graduate degree or higher      | 0.708 (-4.921, 6.337)    | 0.805   |
|                                                                                                                                                              | Parent education: Some college or Bachelor's degree - Graduate degree or higher | -0.646 (-4.553, 3.262)   | 0.746   |



**eTable 7b: Full family longitudinal analysis**

| <b>Effect label</b>                                                             | <b>Estimate (95% CI)</b> | <b>P-value</b> |
|---------------------------------------------------------------------------------|--------------------------|----------------|
| FBT - UC                                                                        | -5.163 (-6.579, -3.747)  | <.0001         |
| Follow-up months                                                                | 0.176 (0.095, 0.257)     | <.0001         |
| Study site: Buffalo - St. Louis                                                 | 2.299 (0.279, 4.32)      | 0.0260         |
| Study site: Columbus - St. Louis                                                | -0.063 (-2.135, 2.009)   | 0.9523         |
| Study site: Rochester - St. Louis                                               | -1.146 (-3.114, 0.821)   | 0.2525         |
| Baseline % over median BMI                                                      | -0.046 (-0.067, -0.026)  | <.0001         |
| Family role: Parents - Participating children                                   | -2.228 (-5.585, 1.129)   | 0.1899         |
| Family role: Siblings - Participating children                                  | -0.541 (-1.954, 0.873)   | 0.4514         |
| One-month increase in follow-up during COVID                                    | 0.237 (0.073, 0.402)     | 0.0047         |
| Sex: Female - Male                                                              | 0.3 (-0.885, 1.486)      | 0.6147         |
| Race: White - Black                                                             | -3.548 (-5.064, -2.031)  | <.0001         |
| Race: Other race - Black                                                        | -1.968 (-4.403, 0.467)   | 0.1128         |
| Age at baseline                                                                 | -0.059 (-0.157, 0.039)   | 0.2374         |
| Household income (in \$1000's)                                                  | 0.002 (-0.015, 0.019)    | 0.8131         |
| Parent education: High school graduate or less - Graduate degree or higher      | 0.478 (-2.064, 3.02)     | 0.7121         |
| Parent education: Some college or Bachelor's degree - Graduate degree or higher | 1.103 (-0.577, 2.784)    | 0.1978         |

**eTable 7c: Full family longitudinal analysis, with treatment effect stratified by family role**

| <b>Effect label</b>                                                             | <b>Estimate (95% CI)</b> | <b>P-value</b> |
|---------------------------------------------------------------------------------|--------------------------|----------------|
| Treatment effect in Children                                                    | -6.48 (-8.05, -4.91)     | <.0001         |
| Treatment effect in Parents                                                     | -3.97 (-5.68, -2.26)     | <.0001         |
| Treatment effect in Siblings                                                    | -5.32 (-8.47, -2.17)     | 0.0012         |
| Follow-up months                                                                | 0.176 (0.095, 0.257)     | <.0001         |
| Study site: Buffalo - St. Louis                                                 | 2.277 (0.253, 4.302)     | 0.0277         |
| Study site: Columbus - St. Louis                                                | -0.043 (-2.115, 2.029)   | 0.9674         |
| Study site: Rochester - St. Louis                                               | -1.155 (-3.125, 0.816)   | 0.2499         |
| Baseline % over median BMI                                                      | -0.046 (-0.067, -0.025)  | <.0001         |
| One-month increase in follow-up during COVID                                    | 0.238 (0.073, 0.402)     | 0.0046         |
| Sex: Female - Male                                                              | 0.284 (-0.897, 1.465)    | 0.6325         |
| Race: White - Black                                                             | -3.499 (-5.02, -1.979)   | <.0001         |
| Race: Other race - Black                                                        | -1.785 (-4.226, 0.655)   | 0.1509         |
| Age at baseline                                                                 | -0.056 (-0.154, 0.041)   | 0.2550         |
| Household income (in \$1000's)                                                  | 0.002 (-0.015, 0.019)    | 0.7987         |
| Parent education: High school graduate or less - Graduate degree or higher      | 0.461 (-2.083, 3.005)    | 0.7219         |
| Parent education: Some college or Bachelor's degree - Graduate degree or higher | 1.105 (-0.579, 2.79)     | 0.1980         |

**eTable 7d: Full family longitudinal analysis, stratified effects from additional exploratory analyses**

| <b>Estimate label</b>                      | <b>Estimate (95% CI)</b> | <b>p-value</b> |
|--------------------------------------------|--------------------------|----------------|
| Treatment effect in Children               | -6.38 (-7.94, -4.83)     | <.0001         |
| Treatment effect in Parents                | -3.98 (-5.68, -2.27)     | <.0001         |
| Treatment effect in Siblings               | -5.22 (-8.36, -2.08)     | 0.0014         |
| Effect of race in Children (White - Black) | -6.22 (-8.02, -4.42)     | <.0001         |
| Effect of race in Parents (White - Black)  | -0.82 (-2.61, 0.97)      | 0.3690         |
| Effect of race in Siblings (White - Black) | -2.92 (-6.25, 0.41)      | 0.0853         |
| Effect of COVID time in Children           | 0.54 (0.36, 0.73)        | <.0001         |
| Effect of COVID time in Parents            | -0.17 (-0.37, 0.03)      | 0.0965         |
| Effect of COVID time in Siblings           | 0.62 (0.31, 0.94)        | 0.0001         |

### 11. eTable 8: Full model output for sensitivity analyses

**eTable 8a: Primary analysis of covariance for child outcomes, sensitivity analysis excluding individuals who provided no follow-up after randomization**

| Model                                                                                                                                                            | Model Effect                                                                    | Estimate (95% CI)        | P-value |
|------------------------------------------------------------------------------------------------------------------------------------------------------------------|---------------------------------------------------------------------------------|--------------------------|---------|
| Adjusted for site and baseline % over median only                                                                                                                | FBT - UC                                                                        | -6.198 (-12.107, -0.29)  | 0.040   |
|                                                                                                                                                                  | Baseline % over median BMI                                                      | 1.064 (1.004, 1.124)     | <.001   |
|                                                                                                                                                                  | Study Site: Buffalo - St. Louis                                                 | 2.164 (-2.107, 6.435)    | 0.321   |
|                                                                                                                                                                  | Study Site: Columbus - St. Louis                                                | 3.36 (-0.948, 7.669)     | 0.126   |
|                                                                                                                                                                  | Study Site: Rochester - St. Louis                                               | -4.981 (-9.478, -0.483)  | 0.030   |
| Adjusted for site, baseline % over median, follow-up time, proportion of follow-up during COVID, baseline age, sex, race, parent education, and household income | FBT - UC                                                                        | -6.12 (-10.067, -2.174)  | 0.002   |
|                                                                                                                                                                  | Baseline % over median BMI                                                      | 1.071 (1.009, 1.132)     | <.001   |
|                                                                                                                                                                  | Study Site: Buffalo - St. Louis                                                 | 2.272 (-1.895, 6.439)    | 0.285   |
|                                                                                                                                                                  | Study Site: Columbus - St. Louis                                                | 0.541 (-4.07, 5.151)     | 0.818   |
|                                                                                                                                                                  | Study Site: Rochester - St. Louis                                               | -4.772 (-9.076, -0.467)  | 0.030   |
|                                                                                                                                                                  | Months between baseline and 24-month follow-up                                  | 0.363 (-0.278, 1.004)    | 0.267   |
|                                                                                                                                                                  | Proportion of follow-up after start of COVID-19 pandemic                        | 0.106 (0.033, 0.179)     | 0.005   |
|                                                                                                                                                                  | Child sex: Male - Female                                                        | 0.339 (-2.726, 3.404)    | 0.828   |
|                                                                                                                                                                  | Child race: White - Black                                                       | -8.607 (-12.483, -4.731) | <.001   |
|                                                                                                                                                                  | Child race: Other race - Black                                                  | -2.11 (-8.163, 3.943)    | 0.494   |
|                                                                                                                                                                  | Child age at baseline                                                           | -2.452 (-3.252, -1.652)  | <.001   |
|                                                                                                                                                                  | Parent education: High school graduate or less - Graduate degree or higher      | 0.92 (-4.65, 6.49)       | 0.746   |
|                                                                                                                                                                  | Parent education: Some college or Bachelor's degree - Graduate degree or higher | -0.584 (-4.462, 3.295)   | 0.768   |
|                                                                                                                                                                  | Household income (in \$1000's)                                                  | -0.011 (-0.046, 0.024)   | 0.539   |

**eTable 8b: Primary analysis of covariance for child outcomes, controlled imputation sensitivity analysis**

| <b>Model</b>                                                                                                                                                     | <b>Model Effect</b>                                                             | <b>Estimate (95% CI)</b> | <b>P-value</b> |
|------------------------------------------------------------------------------------------------------------------------------------------------------------------|---------------------------------------------------------------------------------|--------------------------|----------------|
| Adjusted for site and baseline % over median only                                                                                                                | FBT - UC                                                                        | -6.156 (-11.963, -0.35)  | 0.038          |
|                                                                                                                                                                  | Baseline % over median BMI                                                      | 1.065 (1.007, 1.124)     | <.001          |
|                                                                                                                                                                  | Study Site: Buffalo - St. Louis                                                 | 1.708 (-2.506, 5.923)    | 0.427          |
|                                                                                                                                                                  | Study Site: Columbus - St. Louis                                                | 3.157 (-1.11, 7.425)     | 0.147          |
|                                                                                                                                                                  | Study Site: Rochester - St. Louis                                               | -5.372 (-9.842, -0.902)  | 0.019          |
| Adjusted for site, baseline % over median, follow-up time, proportion of follow-up during COVID, baseline age, sex, race, parent education, and household income | FBT - UC                                                                        | -6.181 (-10.042, -2.319) | 0.002          |
|                                                                                                                                                                  | Baseline % over median BMI                                                      | 1.07 (1.011, 1.13)       | <.001          |
|                                                                                                                                                                  | Study Site: Buffalo - St. Louis                                                 | 1.806 (-2.31, 5.923)     | 0.390          |
|                                                                                                                                                                  | Study Site: Columbus - St. Louis                                                | 0.18 (-4.428, 4.788)     | 0.939          |
|                                                                                                                                                                  | Study Site: Rochester - St. Louis                                               | -5.191 (-9.478, -0.905)  | 0.018          |
|                                                                                                                                                                  | Months between baseline and 24-month follow-up                                  | 0.309 (-0.332, 0.951)    | 0.345          |
|                                                                                                                                                                  | Proportion of follow-up after start of COVID-19 pandemic                        | 0.1 (0.026, 0.174)       | 0.008          |
|                                                                                                                                                                  | Child sex: Male - Female                                                        | 0.191 (-2.824, 3.207)    | 0.901          |
|                                                                                                                                                                  | Child race: White - Black                                                       | -8.587 (-12.457, -4.716) | <.001          |
|                                                                                                                                                                  | Child race: Other race - Black                                                  | -1.54 (-7.497, 4.417)    | 0.612          |
|                                                                                                                                                                  | Child age at baseline                                                           | -2.427 (-3.214, -1.639)  | <.001          |
|                                                                                                                                                                  | Parent education: High school graduate or less - Graduate degree or higher      | 0.934 (-4.691, 6.56)     | 0.745          |
|                                                                                                                                                                  | Parent education: Some college or Bachelor's degree - Graduate degree or higher | -0.603 (-4.509, 3.303)   | 0.762          |
| Household income (in \$1000's)                                                                                                                                   | -0.012 (-0.047, 0.024)                                                          | 0.527                    |                |

**eTable 8c: Main model output for full family longitudinal analysis, sensitivity analysis excluding individuals who provided no follow-up after randomization**

| <b>Effect label</b>                                                             | <b>Estimate (95% CI)</b> | <b>p-value</b> |
|---------------------------------------------------------------------------------|--------------------------|----------------|
| FBT - UC                                                                        | -5.298 (-6.684, -3.913)  | <.0001         |
| Follow-up months                                                                | 0.187 (0.103, 0.271)     | <.0001         |
| Study site: Buffalo - St. Louis                                                 | 2.321 (0.446, 4.196)     | 0.0153         |
| Study site: Columbus - St. Louis                                                | -0.087 (-2.105, 1.93)    | 0.9323         |
| Study site: Rochester - St. Louis                                               | -1.375 (-3.282, 0.532)   | 0.1575         |
| Baseline % over median BMI                                                      | -0.048 (-0.064, -0.033)  | <.0001         |
| Family role: Parents - Participating children                                   | -1.033 (-3.987, 1.921)   | 0.4928         |
| Family role: Siblings - Participating children                                  | -0.519 (-1.89, 0.852)    | 0.4574         |
| One-month increase in follow-up during COVID                                    | 0.243 (0.068, 0.418)     | 0.0066         |
| Sex: Female - Male                                                              | 0.455 (-0.583, 1.493)    | 0.3890         |
| Race: White - Black                                                             | -3.438 (-4.994, -1.881)  | <.0001         |
| Race: Other race - Black                                                        | -2.472 (-4.924, -0.021)  | 0.0481         |
| Age at baseline                                                                 | -0.096 (-0.183, -0.008)  | 0.0332         |
| Household income (in \$1000's)                                                  | -0.003 (-0.019, 0.013)   | 0.7096         |
| Parent education: High school graduate or less - Graduate degree or higher      | 0.039 (-2.506, 2.583)    | 0.9763         |
| Parent education: Some college or Bachelor's degree - Graduate degree or higher | 0.858 (-0.828, 2.544)    | 0.3186         |

**eTable 8d: Model with treatment effects stratified by family role**

| <b>Effect label</b>                                                             | <b>Estimate (95% CI)</b> | <b>p-value</b> |
|---------------------------------------------------------------------------------|--------------------------|----------------|
| Treatment effect in Children                                                    | -6.49 (-8.06, -4.92)     | <.0001         |
| Treatment effect in Parents                                                     | -3.95 (-5.57, -2.32)     | <.0001         |
| Treatment effect in Siblings                                                    | -5.13 (-7.9, -2.36)      | 0.0003         |
| Follow-up months                                                                | 0.187 (0.102, 0.271)     | <.0001         |
| Study site: Buffalo - St. Louis                                                 | 2.289 (0.413, 4.165)     | 0.0168         |
| Study site: Columbus - St. Louis                                                | -0.096 (-2.113, 1.921)   | 0.9256         |
| Study site: Rochester - St. Louis                                               | -1.404 (-3.311, 0.502)   | 0.1488         |
| Baseline % over median BMI                                                      | -0.048 (-0.063, -0.033)  | <.0001         |
| One-month increase in follow-up during COVID                                    | 0.243 (0.068, 0.418)     | 0.0065         |
| Sex: Female - Male                                                              | 0.475 (-0.565, 1.514)    | 0.3697         |
| Race: White - Black                                                             | -3.382 (-4.939, -1.825)  | <.0001         |
| Race: Other race - Black                                                        | -2.333 (-4.785, 0.119)   | 0.0622         |
| Age at baseline                                                                 | -0.094 (-0.181, -0.006)  | 0.0366         |
| Household income (in \$1000's)                                                  | -0.003 (-0.019, 0.012)   | 0.6687         |
| Parent education: High school graduate or less - Graduate degree or higher      | 0.013 (-2.535, 2.561)    | 0.9918         |
| Parent education: Some college or Bachelor's degree - Graduate degree or higher | 0.828 (-0.861, 2.517)    | 0.3367         |

**eTable 8e: Stratified effects from additional exploratory analyses**

| <b>Estimate label</b>                      | <b>Estimate (95% CI)</b> | <b>p-value</b> |
|--------------------------------------------|--------------------------|----------------|
| Treatment effect in Children               | -6.41 (-7.97, -4.84)     | <.0001         |
| Treatment effect in Parents                | -3.95 (-5.57, -2.33)     | <.0001         |
| Treatment effect in Siblings               | -5.21 (-7.94, -2.48)     | 0.0002         |
| Effect of race in Children (White - Black) | -6 (-7.71, -4.29)        | <.0001         |
| Effect of race in Parents (White - Black)  | -0.54 (-2.39, 1.31)      | 0.5683         |
| Effect of race in Siblings (White - Black) | -2.19 (-5.11, 0.73)      | 0.1412         |
| Effect of COVID time in Children           | 0.53 (0.34, 0.72)        | <.0001         |
| Effect of COVID time in Parents            | -0.21 (-0.41, -0.01)     | 0.0367         |
| Effect of COVID time in Siblings           | 0.58 (0.26, 0.89)        | 0.0004         |



**eTable 8f: Main model output: Full family longitudinal analysis, controlled imputation sensitivity analysis**

| <b>Effect label</b>                                                             | <b>Estimate (95% CI)</b> | <b>p-value</b> |
|---------------------------------------------------------------------------------|--------------------------|----------------|
| FBT - UC                                                                        | -5.119 (-6.554, -3.683)  | <.0001         |
| Follow-up months                                                                | 0.186 (0.105, 0.266)     | <.0001         |
| Study site: Buffalo - St. Louis                                                 | 2.323 (0.271, 4.374)     | 0.0267         |
| Study site: Columbus - St. Louis                                                | -0.196 (-2.297, 1.904)   | 0.8543         |
| Study site: Rochester - St. Louis                                               | -1.281 (-3.275, 0.714)   | 0.2075         |
| Baseline % over median BMI                                                      | -0.046 (-0.067, -0.025)  | 0.0001         |
| Family role: Parents - Participating children                                   | -1.476 (-4.845, 1.893)   | 0.3852         |
| Family role: Siblings - Participating children                                  | -0.191 (-1.609, 1.226)   | 0.7905         |
| One-month increase in follow-up during COVID                                    | 0.211 (0.047, 0.376)     | 0.0117         |
| Sex: Female - Male                                                              | 0.279 (-0.912, 1.471)    | 0.6408         |
| Race: White - Black                                                             | -3.649 (-5.185, -2.113)  | <.0001         |
| Race: Other race - Black                                                        | -1.81 (-4.268, 0.647)    | 0.1482         |
| Age at baseline                                                                 | -0.068 (-0.166, 0.031)   | 0.1744         |
| Household income (in \$1000's)                                                  | 0.003 (-0.014, 0.02)     | 0.7113         |
| Parent education: High school graduate or less - Graduate degree or higher      | 0.705 (-1.874, 3.285)    | 0.5914         |
| Parent education: Some college or Bachelor's degree - Graduate degree or higher | 1.25 (-0.458, 2.958)     | 0.1512         |

**eTable 8g: Model with treatment effects stratified by family role**

| <b>Effect label</b>                                                             | <b>Estimate (95% CI)</b> | <b>p-value</b> |
|---------------------------------------------------------------------------------|--------------------------|----------------|
| Treatment effect in Children                                                    | -6.45 (-8.04, -4.87)     | <.0001         |
| Treatment effect in Parents                                                     | -3.9 (-5.62, -2.17)      | <.0001         |
| Treatment effect in Siblings                                                    | -5.34 (-8.5, -2.17)      | 0.0012         |
| Follow-up months                                                                | 0.186 (0.105, 0.266)     | <.0001         |
| Study site: Buffalo - St. Louis                                                 | 2.302 (0.248, 4.356)     | 0.0283         |
| Study site: Columbus - St. Louis                                                | -0.173 (-2.274, 1.927)   | 0.8711         |
| Study site: Rochester - St. Louis                                               | -1.29 (-3.287, 0.708)    | 0.2050         |
| Baseline % over median BMI                                                      | -0.046 (-0.067, -0.025)  | 0.0001         |
| One-month increase in follow-up during COVID                                    | 0.212 (0.048, 0.376)     | 0.0114         |
| Sex: Female - Male                                                              | 0.262 (-0.925, 1.448)    | 0.6609         |
| Race: White - Black                                                             | -3.6 (-5.14, -2.06)      | <.0001         |
| Race: Other race - Black                                                        | -1.618 (-4.08, 0.845)    | 0.1972         |
| Age at baseline                                                                 | -0.065 (-0.163, 0.033)   | 0.1890         |
| Household income (in \$1000's)                                                  | 0.003 (-0.014, 0.02)     | 0.6975         |
| Parent education: High school graduate or less - Graduate degree or higher      | 0.69 (-1.892, 3.272)     | 0.5999         |
| Parent education: Some college or Bachelor's degree - Graduate degree or higher | 1.255 (-0.457, 2.967)    | 0.1506         |

**eTable 8h: Stratified effects from additional exploratory analyses**

| <b>Estimate label</b>                      | <b>Estimate (95% CI)</b> | <b>p-value</b> |
|--------------------------------------------|--------------------------|----------------|
| Treatment effect in Children               | -6.36 (-7.93, -4.78)     | <.0001         |
| Treatment effect in Parents                | -3.91 (-5.62, -2.19)     | <.0001         |
| Treatment effect in Siblings               | -5.24 (-8.39, -2.09)     | 0.0014         |
| Effect of race in Children (White - Black) | -6.36 (-8.17, -4.55)     | <.0001         |
| Effect of race in Parents (White - Black)  | -0.88 (-2.68, 0.92)      | 0.3388         |
| Effect of race in Siblings (White - Black) | -2.9 (-6.25, 0.44)       | 0.0880         |
| Effect of COVID time in Children           | 0.52 (0.34, 0.71)        | <.0001         |
| Effect of COVID time in Parents            | -0.2 (-0.4, 0)           | 0.0447         |
| Effect of COVID time in Siblings           | 0.59 (0.28, 0.91)        | 0.0002         |

**12. eTable 9: Serious Adverse Events by site, group and family member organized by whether the event was reported during or between a scheduled visit.**

| Group                            | Buffalo |     | Columbus |     | Rochester |     | St. Louis |     |
|----------------------------------|---------|-----|----------|-----|-----------|-----|-----------|-----|
|                                  | UC      | FBT | UC       | FBT | UC        | FBT | UC        | FBT |
| <b>Related to study</b>          |         |     |          |     |           |     |           |     |
| Index Child                      | 0       | 0   | 0        | 0   | 0         | 0   | 0         | 0   |
| Index Parent                     | 0       | 0   | 0        | 0   | 0         | 0   | 0         | 0   |
| Other                            | 0       | 0   | 0        | 0   | 0         | 0   | 0         | 0   |
| <b>Possibly related to study</b> |         |     |          |     |           |     |           |     |
| Index Child                      | 0       | 0   | 0        | 1   | 0         | 0   | 0         | 0   |
| Index Parent                     | 0       | 0   | 0        | 0   | 0         | 0   | 0         | 1   |
| Other                            | 0       | 0   | 0        | 0   | 0         | 0   | 0         | 1   |
| <b>Not related to study</b>      |         |     |          |     |           |     |           |     |
| Index Child                      | 0       | 1   | 3        | 3   | 3         | 1   | 1         | 5   |
| Index Parent                     | 4       | 3   | 6        | 11  | 8         | 5   | 4         | 8   |
| Other                            | 0       | 0   | 0        | 0   | 1         | 2   | 0         | 3   |
| <b>Total</b>                     | 4       | 4   | 9        | 15  | 12        | 8   | 5         | 18  |

Note. UC = Usual care, FBT = Family-based treatment. A Serious Adverse Event (SAE) is any adverse event which: a) results in death, b) is life threatening, c). requires in-patient hospitalization, or prolongation of an existing hospitalization, d). Result in persistent or significant disability and/or incapacity, e). Is a congenital anomaly / birth defect in the offspring of an index parent/adult or teen. Other includes siblings and non-index parent

### 13. Modifications to the Data Analytic Plan

Modifications to the data analytic plan as described in the protocol paper include the following:

- **Covariates:** Our primary analyses as described in the protocol paper included no covariates. We revised that plan to include study site as a covariate in all analyses of covariance and longitudinal models. The covariate-adjusted model was intended to include whether the child came from a one or two parent family. However, because PLAN did not collect the required data, this variable is not included in the models.
- **Imputation method:** The protocol paper indicated that we would impute data using robust maximum likelihood methods. However, following discussions with statistical colleagues at NHLBI, we decided to use multiple imputation instead.
- **Secondary and exploratory analyses:** The analytic plan in the protocol and protocol paper outlines a variety of secondary and exploratory analyses. Because of space considerations and an assessment of their appropriateness in the primary endpoint paper, many of these analyses are not included in the current paper. We intend to explore many of these secondary and exploratory analyses in future manuscripts.
- **COVID analyses:** Because the burdens of COVID-19 were unforeseeable when we published the protocol paper, we did not pre-specify COVID-related analyses. Those plans were developed subsequently as the impact of COVID on the study became clear. Analytic methods examining the impact of COVID-19 were informed by conversations with statistical colleagues at NHLBI and the DSMB. Specifically, in the primary analysis of covariance, a variable reflecting the total number of months from the start of the COVID-19 pandemic (March 16, 2020) to the 24-month follow-up date was included as a covariate in the model. A value of 0 months was used for individuals who had their 24-month follow-up prior to the start of the pandemic. In the longitudinal full-family models, a time-varying variable indicating the number of months from the start of the COVID-19 pandemic to the date of the follow-up time point was included as a covariate. Again, a value of 0 months was used for any follow-up time points that occurred prior to the start of the COVID-19 pandemic.
- **Longitudinal models:** For reasons described in the paper, we planned to and did use growth curve models in analyzing the longitudinal data. We also anticipated some form of non-linearity over time. When we graphed the original data prior to performing the analyses, we noticed one linear trend from baseline to 6 months and a second linear trend from 6 months to 24 months. To account for this, we used the change from baseline as the outcome of interest, which allowed us to model the 6 to 24 month linear trend without needing to also model the separate linear trend from baseline to 6 months. Because of this clear linearity from 6 to 24 months we did not need to use piecewise spline models or explore additional non-linear models, which were possible analytic strategies described in the protocol and protocol paper.
- **Sensitivity analyses:** We used modified intention to treat analyses as indicated in the protocol paper. However, following discussions with statistical colleagues at NHLBI, we decided to add an additional sensitivity analysis using controlled imputation. This

allowed us to evaluate whether the results we reported would be impacted if we modified the multiple imputation approach.

- **Family-level analyses:** In order to evaluate the overall effectiveness of FBT on the full family unit, we decided to use all individuals (participating children, parents, and siblings) in one model instead of analyzing each sub-population separately. This was only done for the longitudinal models. In order to determine the effect of FBT in each unique family member, we included an interaction term between family member type and treatment in these full family models. We opted for this approach as it allowed us to make direct comparisons regarding FBT's effectiveness across the three sub-populations without needing to perform separate statistical analyses for each group. This approach differs from the analyses outlined in the protocol and protocol paper, which indicated that we would evaluate each population separately.
- **Moderators of treatment effects:** We decided to assess covariates as potential moderators of treatment effects in order to determine whether certain subgroups of individuals benefitted differentially from FBT, or whether certain factors impacted the effectiveness of FBT. Because these analyses were not pre-specified in the protocol paper, they are exploratory in nature only.
- **Relationships between child, parent, and sibling weight change:** We felt that examining relationships between child, parent, and sibling weight changes over time was an important addition to our discussion of family-level effects of FBT. As such, we added these analyses because we believe they provide important context that enhances the manuscript's findings.

#### **14. Additional analytic details**

Using data from 10 multiply imputed datasets, we found the average observed ICC for site to be 0.02.

## 15. References

1. Kalarchian MA, Levine MD, Arslanian SA, Ewing LJ, Houck PR, Cheng Y, Ringham RM, Sheets CA, Marcus MD. Family-Based Treatment of Severe Pediatric Obesity: Randomized, Controlled Trial. *Pediatrics*. 2009;124:1060-1068.
2. Epstein LH, Wing RR, Koeske R, Andrasik F, Ossip DJ. Child and parent weight loss in family-based behavior modification programs. *J Consult Clin Psychol*. 1981;49:674-685.
3. Epstein LH, Wing RR, Koeske R, Valoski A. A comparison of lifestyle exercise, aerobic exercise and calisthenics on weight loss in obese children. *Behav Ther*. 1985;16:345-356.
4. Epstein LH, Paluch RA, Gordy CC, Saelens BE, Ernst MM. Problem solving in the treatment of childhood obesity. *J Consult Clin Psychol*. 2000;68:717-721.
5. Epstein LH, Paluch RA, Gordy CC, Dorn J. Decreasing sedentary behaviors in treating pediatric obesity. *Arch Pediatr Adolesc Med*. 2000;154:220-226.
6. Epstein LH, Paluch RA, Kilanowski CK, Raynor HA. The effect of reinforcement or stimulus control to reduce sedentary behavior in the treatment of pediatric obesity. *Health Psychol*. 2004;23:371-380.
7. Epstein LH, Roemmich JN, Stein RI, Paluch RA, Kilanowski CK. The challenge of identifying behavioral alternatives to food: clinic and field studies. *Ann Behav Med*. 2005;30:201-209.
8. Fagg J, Chadwick P, Cole TJ, Cummins S, Goldstein H, Lewis H, Morris S, Radley D, Sacher P, Law C. From trial to population: a study of a family-based community intervention for childhood overweight implemented at scale. *Int J Obes*. 2014;38:1343-1349. PMC4175967
9. Sacher PM, Kolotourou M, Chadwick PM, Cole TJ, Lawson MS, Lucas A, Singhal A. Randomized controlled trial of the MEND program: a family-based community intervention for childhood obesity. *Obesity*. 2010;18 Suppl 1:S62-S68.
