# Supplementary material
Source: PubMed Central journal article supplement (PMC10265310)
Supplement: jama-e238061-s003.pdf [file jama-e238061-s003.pdf]

## **Data Sharing Statement**

### **Data**

**Data available:** Yes

**Data types:** Deidentified participant data, Data dictionary

**How to access data:** NHLBI's BioLINCC data repository.

**When available:** With publication

### **Supporting Documents**

**Document types:** None

### **Additional Information**

**Who can access the data:** Researchers whose proposed use of data has been approved

**Types of analyses:** for approved specified purpose

**Mechanisms of data availability:** after approval of a proposal
